# Supplementary material for: Teleconsultation for pediatric patients with type 1 diabetes mellitus during the COVID-19 pandemic: experience of a university hospital in Brazil
Source: Research Square preprint supplement (doi:10.21203/rs.3.rs-603528/v1), 2021-06-22
Supplement: Supplementary file 1 [file 2a942f92d2f6d8e30e6e7a7d.docx]

| Characteristics | Number of patients (n = 143) |
| --- | --- |
| **Sex** |  |
| - Female | 82 (57%) |
| - Male | 61 (43%) |
| **Age** |  |
| - Infant (0-2 years) | 4 (3%) |
| - Early Childhood (2-7 years) | 17 (12%) |
| - Middle Childhood (7-11 years) | 37 (26%) |
| - Adolescence (11-20 years) | 85 (59%) |
| **Diagnosis time of T1DM** |  |
| - New cases | 13 (9%) |
| - 0-2 years of diagnosis | 44 (30%) |
| - 2-5 years of diagnosis | 34 (24%) |
| - 5-10 years of diagnosis | 32 (22%) |
| - More than 10 years of diagnosis | 11 (15%) |

**Table 1 - Description of pediatric diabetic patients followed by teleconsultation from April to September 2020.**
